# Supplementary material for: Assessment of emerging polar organic pollutants linked to contaminant pathways within an urban estuary using non-targeted analysis
Source: Royal Society of Chemistry journal article supplement (doi:10.1039/d0em00463d), 2021-01-01
Supplement: d0em00463d2.xlsx [file d0em00463d2.xlsx]

## Sheet: Sheet 1
Compound name	InChIKey	Molecular formula	Measured mass	Chrom. Retention Time	Maximum observed peak area	Spectral library match value	Spectral library matched	Mass measurement error (ppm)	Observed Adduct
Fexofenadine	RWTNPBWLLIMQHL-UHFFFAOYSA-N	C32H39NO4	501.288	17.7881	1.79239e+08	92.5199	mzVault	0.193352
Tris(2-butoxyethyl) phosphate	WTLBZVNBAKMVDP-UHFFFAOYSA-N	C18H39O7P	398.243	26.6797	1.03907e+08	94.2043	mzVault	0.0611527
3-Cyclohexyl-1,1-dimethylurea	PZWXYRDNQYUIIU-UHFFFAOYSA-N	C9H18N2O	170.142	11.3885	4.13222e+07	97.9234	mzVault	0.163914
Losartan	PSIFNNKUMBGKDQ-UHFFFAOYSA-N	C22H23ClN6O	422.162	16.4628	3.89579e+07	93.6004	mzCloud	0.0770658
Lamotrigine	PYZRQGJRPPTADH-UHFFFAOYSA-N	C9H7Cl2N5	255.008	8.86526	3.234e+07	97.6758	mzCloud	0.439293
Pentapropylene glycol	AQRQHYITOOVBTO-UHFFFAOYSA-N	C15H32O6	308.22	11.1035	2.80965e+07	91.7921	mzVault	-0.362589
Octapropylene glycol	ZZEANNAZZVVPKU-UHFFFAOYSA-N	C24H50O9	482.345	16.6982	2.42623e+07	86.8051	mzVault	0.246718
Hexapropylene glycol	UDOJNGPPRYJMKR-UHFFFAOYSA-N	C18H38O7	366.262	13.1181	2.47642e+07	93.6003	mzVault	-0.35327
Gabapentin related compound A	JAWPQJDOQPSNIQ-UHFFFAOYSA-N	C9H15NO	153.115	12.0683	1.95899e+07	97.6399	mzVault	0.454144
rac erythro-Dihydrobupropion	NDPTTXIBLSWNSF-UHFFFAOYSA-N	C13H20ClNO	241.123	11.6683	1.93108e+07	98.8178	mzVault	0.0265881
DEET	MMOXZBCLCQITDF-UHFFFAOYSA-N	C12H17NO	191.131	16.5303	1.60416e+07	92.6007	mzCloud	0.0328656
Metoprolol	IUBSYMUCCVWXPE-UHFFFAOYSA-N	C15H25NO3	267.183	9.32061	1.52959e+07	97.1832	mzCloud	-0.184134
Hydroxybupropion	RCOBKSKAZMVBHT-UHFFFAOYSA-N	C13H18ClNO2	255.103	9.15862	1.57479e+07	90.8356	mzVault	0.173449
PPG n10	MCVKSYYBBHNAFN-UHFFFAOYSA-N	C30H62O11	598.429	20.3097	1.36831e+07	79.7253	mzCloud	1.96881
Isopropyl myristate	AXISYYRBXTVTFY-UHFFFAOYSA-N	C17H34O2	270.256	20.332	1.34886e+07	79.8103	mzCloud	-0.458377	[M+H-NH3]+
Flecainide	DJBNUMBKLMJRSA-UHFFFAOYSA-N	C17H20F6N2O3	414.138	15.2476	1.33315e+07	75.3267	mzVault	-0.413547	[M+NH4]+
Galaxolidone	PGMHPYRIXBRRQD-UHFFFAOYSA-N	C18H24O2	272.178	27.1384	1.25357e+07	97.0632	mzVault	0.215824
Valsartan	ACWBQPMHZXGDFX-UHFFFAOYSA-N	C24H29N5O3	435.227	19.917	1.2519e+07	94.3149	mzVault	0.315888
Decaethylene glycol	DTPCFIHYWYONMD-UHFFFAOYSA-N	C20H42O11	458.273	8.08838	1.30273e+07	86.1124	mzVault	0.331834
Undecaethylene glycol	PSVXZQVXSXSQRO-UHFFFAOYSA-N	C22H46O12	502.299	8.60789	1.18192e+07	88.361	mzVault	0.683181
O-Desvenlafaxine	KYYIDSXMWOZKMP-UHFFFAOYSA-N	C16H25NO2	263.189	8.21018	1.16049e+07	99.6703	mzVault	-0.105538
Lidocaine	NNJVILVZKWQKPM-UHFFFAOYSA-N	C14H22N2O	234.173	7.26332	1.09729e+07	99.9981	mzVault	-0.0556466
Triethyl citrate	DOOTYTYQINUNNV-UHFFFAOYSA-N	C12H20O7	276.121	13.3629	1.09567e+07	95.8541	mzVault	-0.507788
Atenolol	METKIMKYRPQLGS-UHFFFAOYSA-N	C14H22N2O3	266.163	3.68787	9.95137e+06	97.2299	mzCloud	-0.0304571
Hexapropylene glycol monobutyl ether	IRPNLTXZOZAPQA-UHFFFAOYSA-N	C22H46O7	422.324	23.2488	9.64228e+06	89.4545	mzVault	-0.364843
Brilliant blue FCF	CTRXDTYTAAKVSM-UHFFFAOYSA-O	C37H37N2O9S3+	749.166	12.2213	9.49708e+06	89.427	mzCloud	2.01212
Telmisartan	RMMXLENWKUUMAY-UHFFFAOYSA-N	C33H30N4O2	514.237	17.5945	9.25143e+06	98.5982	mzCloud	0.38566
10-Hydroxycarbazepine	BMPDWHIDQYTSHX-UHFFFAOYSA-N	C15H14N2O2	254.106	10.5746	8.66519e+06	89.4416	mzCloud	-0.0153822
EDDP	AJRJPORIQGYFMT-UHFFFAOYSA-N	C20H23N	277.183	15.8552	8.24922e+06	97.8301	mzVault	-0.231624
Pentapropylene glycol monobutyl ether	WWWKWKCNXDSZKV-UHFFFAOYSA-N	C19H40O6	364.282	21.3904	8.11137e+06	84.842	mzVault	-0.363595
Adenosine	OIRDTQYFTABQOQ-UHFFFAOYSA-N	C10H13N5O4	267.097	1.17643	7.53205e+06	99.9794	mzVault	-0.24465
Triethylene glycol monobutyl ether	COBPKKZHLDDMTB-UHFFFAOYSA-N	C10H22O4	206.152	10.3269	7.49763e+06	81.2065	mzVault	0.0653537
Tri(3-chloropropyl) phosphate	WOURXYYHORRGQO-UHFFFAOYSA-N	C9H18Cl3O4P	326.001	20.3317	7.31414e+06	87.6327	mzVault	-0.102458
Irbesartan	YOSHYTLCDANDAN-UHFFFAOYSA-N	C25H28N6O	428.232	16.7407	6.96046e+06	96.8127	mzVault	-0.304255
Cetirizine	ZKLPARSLTMPFCP-UHFFFAOYSA-N	C21H25ClN2O3	388.155	17.5114	7.02794e+06	99.7402	mzVault	-0.179069
Trimethoprim	IEDVJHCEMCRBQM-UHFFFAOYSA-N	C14H18N4O3	290.138	7.03468	6.83628e+06	98.02	mzVault	-0.310089
Venlafaxine	PNVNVHUZROJLTJ-UHFFFAOYSA-N	C17H27NO2	277.204	11.8733	6.77013e+06	97.9362	mzVault	-0.122594
Mycophenolic acid	HPNSFSBZBAHARI-UHFFFAOYSA-N	C17H20O6	320.126	17.425	6.65367e+06	96.6348	mzVault	-0.0867846
Caffeine	RYYVLZVUVIJVGH-UHFFFAOYSA-N	C8H10N4O2	194.08	6.162	6.63443e+06	95.7191	mzCloud	2.46934
rac erythro-Dihydrobupropion	NDPTTXIBLSWNSF-UHFFFAOYSA-N	C13H20ClNO	241.123	11.7629	1.83386e+07	98.8018	mzVault	0.429141
Dimethylaminopurine	BVIAOQMSVZHOJM-UHFFFAOYSA-N	C7H9N5	163.086	1.85998	6.58009e+06	92.6012	mzVault	0.768896
Poly THF n7	GLMVYOLOOZINLY-UHFFFAOYSA-N	C28H58O8	522.413	29.1144	6.52514e+06	80.8416	mzCloud	0.658463
Nonapropylene glycol monobutyl ether	BKXWJEGSRDVZLW-UHFFFAOYSA-N	C31H64O10	596.45	27.7626	6.12628e+06	88.7701	mzVault	0.876343
Octapropylene glycol monobutyl ether	NAJKOMZKJUQKCF-UHFFFAOYSA-N	C28H58O9	538.408	26.9442	5.91462e+06	91.5172	mzVault	0.344004
Sitagliptin	MFFMDFFZMYYVKS-UHFFFAOYSA-N	C16H15F6N5O	407.118	11.0053	5.58e+06	96.5555	mzVault	-0.132782	[M+NH4]+
Diltiazem	HSUGRBWQSSZJOP-UHFFFAOYSA-N	C22H26N2O4S	414.161	15.5823	5.12506e+06	96.0255	mzCloud	-0.20084
Tetraethylene glycol monomethyl ether	ZNYRFEPBTVGZDN-UHFFFAOYSA-N	C9H20O5	208.131	4.65616	5.12287e+06	92.7801	mzVault	0.0346802
Tetrakis(2-hydroxypropyl)ethylenediamine	NSOXQYCFHDMMGV-UHFFFAOYSA-N	C14H32N2O4	292.236	1.16522	5.11663e+06	94.4069	mzCloud	-0.487297
Lumichrome	ZJTJUVIJVLLGSP-UHFFFAOYSA-N	C12H10N4O2	242.08	10.5184	5.09656e+06	94.5199	mzVault	0.0167685
Citalopram	WSEQXVZVJXJVFP-UHFFFAOYSA-N	C20H21FN2O	324.164	15.0571	4.79023e+06	96.2098	mzCloud	-0.527695
Benzoylecgonine	GVGYEFKIHJTNQZ-UHFFFAOYSA-N	C16H19NO4	289.131	7.94656	4.7752e+06	98.0978	mzVault	-0.233574
Pyroquilon	XOMCWUAQMIBCIS-UHFFFAOYSA-N	C11H11NO	173.084	2.99072	4.91903e+06	82.7898	mzCloud	0.239178
Fluconazole	RFHAOTPXVQNOHP-UHFFFAOYSA-N	C13H12F2N6O	306.104	8.77017	4.41532e+06	97.2512	mzCloud	-0.316507
3-Hydroxymorphinan	IYNWSQDZXMGGGI-UHFFFAOYSA-N	C16H21NO	243.162	8.91234	4.39586e+06	96.2273	mzVault	-0.0781515
Di(propylene glycol) butyl ether	CUVLMZNMSPJDON-UHFFFAOYSA-N	C10H22O3	190.157	13.9909	4.36049e+06	89.5871	mzVault	-0.0127118
Carbmazepine	FFGPTBGBLSHEPO-UHFFFAOYSA-N	C15H12N2O	236.095	14.7293	4.34436e+06	99.2154	mzVault	0.0693015
rac erythro-Dihydrobupropion	NDPTTXIBLSWNSF-UHFFFAOYSA-N	C13H20ClNO	241.123	11.3685	4.19346e+06	89.0957	mzVault	0.0611432
Ranolazine	XKLMZUWKNUAPSZ-UHFFFAOYSA-N	C24H33N3O4	427.247	13.5727	4.17564e+06	94.4346	mzVault	-0.165222
N,N'-Dicyclohexylurea	ADFXKUOMJKEIND-UHFFFAOYSA-N	C13H24N2O	224.189	18.1918	4.13651e+06	99.4304	mzCloud	-0.00033267
Aminodiphenylmethane	MGHPNCMVUAKAIE-UHFFFAOYSA-N	C13H13N	183.105	14.669	3.96288e+06	87.1549	mzVault	0.0706999	[M+NH4]+
PPG n10	MCVKSYYBBHNAFN-UHFFFAOYSA-N	C30H62O11	598.429	19.7491	3.92217e+06	85.8395	mzCloud	1.40899	[M+H-NH3]+
Darunavir	CJBJHOAVZSMMDJ-UHFFFAOYSA-N	C27H37N3O7S	547.235	18.8612	3.90863e+06	93.9198	mzVault	0.839452
Citroflex A-4	QZCLKYGREBVARF-UHFFFAOYSA-N	C20H34O8	402.225	28.3308	3.88661e+06	91.1967	mzCloud	-0.40339
O-Desmethyltramadol	UWJUQVWARXYRCG-UHFFFAOYSA-N	C15H23NO2	249.173	6.30561	3.79935e+06	97.8701	mzVault	0.106093
Codeine	OROGSEYTTFOCAN-UHFFFAOYSA-N	C18H21NO3	299.152	5.12474	3.74604e+06	92.2606	mzCloud	0.170473
Aminodiphenylmethane	MGHPNCMVUAKAIE-UHFFFAOYSA-N	C13H13N	183.105	14.5452	3.60681e+06	87.331	mzVault	0.177782	[M+NH4]+
6-(Methylthio)guanine	YEGKYFQLKYGHAR-UHFFFAOYSA-N	C6H7N5S	181.042	3.65717	3.46902e+06	90.3454	mzVault	0.374692
Sitagliptin	MFFMDFFZMYYVKS-UHFFFAOYSA-N	C16H15F6N5O	407.118	11.0512	5.48223e+06	94.7338	mzVault	0.185042
Dihydrocodeine	RBOXVHNMENFORY-UHFFFAOYSA-N	C18H23NO3	301.168	6.11962	3.41289e+06	93.4511	mzCloud	-0.370689
Iminostilbene	LCGTWRLJTMHIQZ-UHFFFAOYSA-N	C14H11N	193.089	10.5743	3.33493e+06	89.9137	mzCloud	0.234123
2-(3,4-Dimethoxyphenyl)-5-methylamino-2-isopropylvaleronitrile	WLOBUUJURNEQCL-UHFFFAOYSA-N	C17H26N2O2	290.199	13.0784	3.33176e+06	96.6152	mzCloud	-0.152171
Carbendazim	TWFZGCMQGLPBSX-UHFFFAOYSA-N	C9H9N3O2	191.069	5.0795	3.17416e+06	99.3637	mzVault	0.322802
N-[4-[1-hydroxy-2-(propan-2-ylamino)ethyl]phenyl]methanesulfonamide	ZBMZVLHSJCTVON-UHFFFAOYSA-N	C12H20N2O3S	272.119	3.24999	3.05257e+06	98.5157	mzVault	-0.101598
6-Chloro-5-methyl-1H-1,2,3-benzotriazole	UJEYPGIFRHXEJE-UHFFFAOYSA-N	C7H6ClN3	167.025	12.2771	3.03823e+06	93.4563	mzCloud	0.220896
Triamterene	FNYLWPVRPXGIIP-UHFFFAOYSA-N	C12H11N7	253.108	7.6314	3.02781e+06	92.3688	mzCloud	0.126119
Pentapropylene glycol monobutyl ether	WWWKWKCNXDSZKV-UHFFFAOYSA-N	C19H40O6	364.282	20.9202	2.98269e+06	80.5156	mzVault	-0.354686
Methocarbamol	GNXFOGHNGIVQEH-UHFFFAOYSA-N	C11H15NO5	241.095	9.26949	2.93866e+06	90.6244	mzCloud	0.0326972
Propafenone	JWHAUXFOSRPERK-UHFFFAOYSA-N	C21H27NO3	341.199	17.1001	2.70069e+06	97.9056	mzVault	-0.333572
Trospium	OYYDSUSKLWTMMQ-UHFFFAOYSA-N	C25H30NO3+	392.222	14.2183	2.66115e+06	90.4453	mzCloud	1.05754
Hexapropylene glycol monobutyl ether	IRPNLTXZOZAPQA-UHFFFAOYSA-N	C22H46O7	422.324	22.7758	3.00628e+06	78.1646	mzVault	-0.35477
Desacetyldiltiazem	NZHUXMZTSSZXSB-UHFFFAOYSA-N	C20H24N2O3S	372.151	13.2463	2.59972e+06	98.3716	mzVault	-0.188308
Atrazine	MXWJVTOOROXGIU-UHFFFAOYSA-N	C8H14ClN5	215.094	15.4991	2.58458e+06	98.6762	mzCloud	0.199239
Imazalil	PZBPKYOVPCNPJY-UHFFFAOYSA-N	C14H14Cl2N2O	296.048	16.7475	2.53579e+06	96.6915	mzVault	-0.396572
Zolpidem phenyl-4-carboxylic acid	FELZONDEFBLTSP-UHFFFAOYSA-N	C19H19N3O3	337.143	8.13637	2.52866e+06	90.7807	mzVault	-0.126426
Didodecyl 3,3'-thiodipropionate oxide	XQQARSOXXGMYHZ-UHFFFAOYSA-N	C30H58O5S	530.4	34.9392	4.03051e+06	85.3215	mzVault	0.348116
Atazanavir	AXRYRYVKAWYZBR-UHFFFAOYSA-N	C38H52N6O7	704.39	18.6268	2.45018e+06	96.1275	mzVault	1.71582
Sulfamethoxazole	JLKIGFTWXXRPMT-UHFFFAOYSA-N	C10H11N3O3S	253.052	9.16903	2.42209e+06	90.0275	mzVault	0.115126
SMZ-PtO		C17H15N7O5S	429.086	10.1011	2.36569e+06	93.5323	mzVault	-0.0792605
Dextromethorphan	MKXZASYAUGDDCJ-UHFFFAOYSA-N	C18H25NO	271.194	13.8272	2.35135e+06	97.8864	mzCloud	-0.0290415
Clopidogrel carboxylic acid	DCASRSISIKYPDD-UHFFFAOYSA-N	C15H14ClNO2S	307.043	9.69094	2.29378e+06	98.5393	mzVault	-0.135864
Morphine	BQJCRHHNABKAKU-UHFFFAOYSA-N	C17H19NO3	285.136	2.05393	2.28707e+06	97.1494	mzCloud	-0.251553
Decaethylene glycol	DTPCFIHYWYONMD-UHFFFAOYSA-N	C20H42O11	458.273	7.07509	2.27597e+06	77.5915	mzVault	0.39044
MLS001183714-01!Clindamycin	KDLRVYVGXIQJDK-UHFFFAOYSA-N	C18H33ClN2O5S	424.18	12.0423	2.23751e+06	99.2563	mzVault	-0.088807
Atorvastatin	XUKUURHRXDUEBC-UHFFFAOYSA-N	C33H35FN2O5	558.253	22.6072	2.20762e+06	91.9974	mzVault	0.935535
Desmethylcitalopram	PTJADDMMFYXMMG-UHFFFAOYSA-N	C19H19FN2O	310.148	14.7414	2.17818e+06	93.979	mzVault	-0.343637
Temazepam	SEQDDYPDSLOBDC-UHFFFAOYSA-N	C16H13ClN2O2	300.067	17.3177	2.17589e+06	97.053	mzVault	-0.357146
N-Acetylsulfapyridine	CYLYVXPHAQLXFG-UHFFFAOYSA-N	C13H13N3O3S	291.068	6.72885	2.08208e+06	95.2593	mzVault	-0.224223
Nonaethylene glycol	YZUUTMGDONTGTN-UHFFFAOYSA-N	C18H38O10	414.246	6.48056	2.01405e+06	80.6163	mzVault	-0.151294
Atenolol	METKIMKYRPQLGS-UHFFFAOYSA-N	C14H22N2O3	266.163	3.5217	2.34034e+06	97.5262	mzCloud	0.0801544
Oxyphenonium	GFRUPHOKLBPHTQ-UHFFFAOYSA-N	C21H34NO3+	348.253	10.2619	1.96713e+06	79.5758	mzCloud	1.19603
Sulfapyridine	GECHUMIMRBOMGK-UHFFFAOYSA-N	C11H11N3O2S	249.057	4.87064	1.94621e+06	96.5487	mzVault	0.0154295
Flecainide	DJBNUMBKLMJRSA-UHFFFAOYSA-N	C17H20F6N2O3	414.138	15.2756	1.30113e+07	99.2013	mzVault	-0.02157
Lauric acid diethanolamide	AOMUHOFOVNGZAN-UHFFFAOYSA-N	C16H33NO3	287.246	23.1994	1.91358e+06	99.3129	mzVault	0.0498721
Fenofibric acid	MQOBSOSZFYZQOK-UHFFFAOYSA-N	C17H15ClO4	318.066	21.9813	1.89544e+06	99.9989	mzVault	-0.349889
2-[(Dimethylamino)methylidene]indan-1-one	PTVLHYNESKGNCV-UHFFFAOYSA-N	C12H13NO	187.1	5.77517	1.88845e+06	76.5067	mzCloud	0.440583
Galaxolidone	PGMHPYRIXBRRQD-UHFFFAOYSA-N	C18H24O2	272.178	27.3555	2.21325e+06	97.0632	mzVault	0.154527
PPG n11	ZRTKYIJRMCSONJ-UHFFFAOYSA-N	C33H68O12	656.471	21.344	1.70046e+07	77.9974	mzCloud	1.29968	[M+H-NH3]+
Erucamide	UAUDZVJPLUQNMU-UHFFFAOYSA-N	C22H43NO	337.334	29.8085	3.2033e+06	92.2795	mzCloud	-0.444812
Olmesartan	VTRAEEWXHOVJFV-UHFFFAOYSA-N	C24H26N6O3	446.207	11.7511	1.83633e+06	88.8816	mzCloud	0.0189142
9-Oxo-10(E),12(E)-octadecadienoic acid	LUZSWWYKKLTDHU-UHFFFAOYSA-N	C18H30O3	294.219	17.6001	1.80138e+06	85.5625	mzCloud	-0.158806
Labetalol	SGUAFYQXFOLMHL-UHFFFAOYSA-N	C19H24N2O3	328.179	12.3047	1.76311e+06	95.3854	mzCloud	-0.254831
6.alpha./.beta.-Hydroxyoxymorphone	AABLHGPVOULICI-UHFFFAOYSA-N	C17H21NO4	303.147	4.08429	1.76075e+06	84.0751	mzVault	-0.104185
MTTA	FTRWLSZFQILOOD-UHFFFAOYSA-N	C12H15NO	189.115	2.89686	1.73747e+06	76.8686	mzCloud	0.286442
N,N'-Diphenylguanidine	OWRCNXZUPFZXOS-UHFFFAOYSA-N	C13H13N3	211.111	7.94559	6.90396e+06	79.3037	mzCloud	-0.0215442
Berberine	YBHILYKTIRIUTE-UHFFFAOYSA-N	C20H18NO4+	336.123	14.1906	1.6994e+06	90.1266	mzCloud	1.34456
Heptapropylene glycol	OWRNLGZKEZSHGO-UHFFFAOYSA-N	C21H44O8	424.304	15.3488	1.67571e+06	94.6732	mzVault	0.474173
PPG n9	DXVLAUMXGHQKAV-UHFFFAOYSA-N	C27H56O10	540.387	18.325	1.37209e+07	92.5327	mzCloud	0.884348	[M+H-NH3]+
Galaxolidone	PGMHPYRIXBRRQD-UHFFFAOYSA-N	C18H24O2	272.178	26.8349	1.66122e+06	91.0954	mzCloud	0.263582
Clarithromycin	AGOYDEPGAOXOCK-UHFFFAOYSA-N	C38H69NO13	747.477	17.972	1.64465e+06	95.3251	mzCloud	1.44271
Carbamazepine 10,11-epoxide	ZRWWEEVEIOGMMT-UHFFFAOYSA-N	C15H12N2O2	252.09	12.6455	1.62084e+06	94.0974	mzVault	-0.123011	[M+NH4]+
Methadone	USSIQXCVUWKGNF-UHFFFAOYSA-N	C21H27NO	309.209	17.8764	1.58736e+06	95.3256	mzCloud	-0.184969
2-(Methylthio)benzothiazole	UTBVIMLZIRIFFR-UHFFFAOYSA-N	C8H7NS2	181.002	20.0761	1.57944e+06	99.9819	mzVault	0.382175
Simazine	ODCWYMIRDDJXKW-UHFFFAOYSA-N	C7H12ClN5	201.078	12.5677	1.56864e+06	79.4807	mzCloud	-0.765772
2-Phenylbenzimidazole-5-sulfonic acid	UVCJGUGAGLDPAA-UHFFFAOYSA-N	C13H10N2O3S	274.041	5.11521	1.5527e+06	94.9932	mzCloud	0.149343
Dihydrocodeine	RBOXVHNMENFORY-UHFFFAOYSA-N	C18H23NO3	301.168	4.84203	1.52116e+06	95.907	mzCloud	-0.344338
Hexa(methoxymethyl)melamine	BNCADMBVWNPPIZ-UHFFFAOYSA-N	C15H30N6O6	390.223	14.2599	1.48133e+06	88.095	mzVault	-0.130698
N-Acetylsulfamethoxazole	GXPIUNZCALHVBA-UHFFFAOYSA-N	C12H13N3O4S	295.063	10.6653	1.46989e+06	88.9779	mzVault	-0.215404
Triethyl phosphate	DQWPFSLDHJDLRL-UHFFFAOYSA-N	C6H15O4P	182.071	10.5981	1.46922e+06	87.2983	mzVault	0.421725
9-Oxo-10(E),12(E)-octadecadienoic acid	LUZSWWYKKLTDHU-UHFFFAOYSA-N	C18H30O3	294.219	19.7452	1.44175e+06	87.0557	mzCloud	-0.170064
9-Oxo-10(E),12(E)-octadecadienoic acid	LUZSWWYKKLTDHU-UHFFFAOYSA-N	C18H30O3	294.219	17.9068	1.4319e+06	85.3497	mzCloud	-0.143687
Triisopropanolamine	SLINHMUFWFWBMU-UHFFFAOYSA-N	C9H21NO3	191.152	1.16079	1.84682e+06	84.1397	mzCloud	0.0850377
Rosuvastatin	BPRHUIZQVSMCRT-UHFFFAOYSA-N	C22H28FN3O6S	481.168	17.8808	1.42151e+06	95.2279	mzCloud	0.42308
Aminodiphenylmethane	MGHPNCMVUAKAIE-UHFFFAOYSA-N	C13H13N	183.105	14.0775	1.41765e+06	83.1343	mzVault	0.189859	[M+NH4]+
Scoparone	GUAFOGOEJLSQBT-UHFFFAOYSA-N	C11H10O4	206.058	8.74423	1.9003e+06	83.1389	mzCloud	0.489222
PPG n8	ZZEANNAZZVVPKU-UHFFFAOYSA-N	C24H50O9	482.345	16.6978	1.02693e+07	87.6532	mzCloud	0.64895	[M+H-NH3]+
Theophylline	ZFXYFBGIUFBOJW-UHFFFAOYSA-N	C7H8N4O2	180.065	4.21327	1.37298e+06	93.9355	mzVault	0.275058
N-Lauroylsarcosine	BACYUWVYYTXETD-UHFFFAOYSA-N	C15H29NO3	271.215	25.5399	1.36001e+06	99.5312	mzVault	-0.198809
α,α-Diphenyl-4-piperidinomethanol	ZMISODWVFHHWNR-UHFFFAOYSA-N	C18H21NO	267.162	12.5831	1.34088e+06	92.7985	mzCloud	-0.0887948
Sulfasalazine	NCEXYHBECQHGNR-UHFFFAOYSA-N	C18H14N4O5S	398.068	15.4759	1.33345e+06	90.6353	mzCloud	-0.1389
Ofloxacin	GSDSWSVVBLHKDQ-UHFFFAOYSA-N	C18H20FN3O4	361.144	8.3047	1.32228e+06	88.0745	mzVault	-0.205589
Fluridone	YWBVHLJPRPCRSD-UHFFFAOYSA-N	C19H14F3NO	329.103	19.5366	1.29847e+06	78.103	mzCloud	-0.278579
4-Phenylbutyric acid	OBKXEAXTFZPCHS-UHFFFAOYSA-N	C10H12O2	164.084	9.04505	1.34159e+06	86.5842	mzCloud	0.503601
8-Methoxyquinolin-4-ol	DJVLMLGPDKKYJW-UHFFFAOYSA-N	C10H9NO2	175.063	10.5971	1.28563e+06	82.9714	mzVault	0.379892
Verapamil	SGTNSNPWRIOYBX-UHFFFAOYSA-N	C27H38N2O4	454.283	17.5398	1.27179e+06	99.8936	mzVault	0.249223
Bis(2-ethylhexyl) amine	SAIKULLUBZKPDA-UHFFFAOYSA-N	C16H35N	241.277	18.2474	1.26727e+06	78.9487	mzCloud	0.0622205
Bis(2,2,6,6-tetramethyl-4-piperidyl) sebacate	XITRBUPOXXBIJN-UHFFFAOYSA-N	C28H52N2O4	480.393	15.0888	1.26512e+06	94.0199	mzVault	0.0290139
Iminostilbene	LCGTWRLJTMHIQZ-UHFFFAOYSA-N	C14H11N	193.089	14.731	1.18879e+06	88.8584	mzCloud	0.144598
N-Desmethyldiltiazem	YOMLDISQSWWYOT-UHFFFAOYSA-N	C21H24N2O4S	400.146	12.4424	1.1868e+06	75.6605	mzVault	-0.176477
Propranolol	AQHHHDLHHXJYJD-UHFFFAOYSA-N	C16H21NO2	259.157	13.4323	1.16569e+06	98.2065	mzVault	-0.122652
4-Hydroxytriamterene	QNJVMSASTUDLGC-UHFFFAOYSA-N	C12H11N7O	269.103	6.1152	1.16196e+06	84.1525	mzVault	0.269318
3,5-Dimethyl-1-phenylpyrazole	ULPMPUPEFBDQQA-UHFFFAOYSA-N	C11H12N2	172.1	16.7914	1.1466e+06	79.1359	mzCloud	0.222873
(-)-Riboflavin	AUNGANRZJHBGPY-UHFFFAOYSA-N	C17H20N4O6	376.138	7.36857	1.13019e+06	93.3398	mzVault	-0.254318
Stearidonic acid	JIWBIWFOSCKQMA-UHFFFAOYSA-N	C18H28O2	276.209	19.8582	1.12888e+06	84.2263	mzVault	-0.107223	[M+H-H2O]+
SMZ-Pt	LVUVWJASQQPDSL-UHFFFAOYSA-N	C17H16N8O4S	428.102	9.71982	1.12265e+06	90.1069	mzVault	-0.0386116
Polygodial	AZJUJOFIHHNCSV-UHFFFAOYSA-N	C15H22O2	234.162	16.3562	1.10549e+06	78.833	mzCloud	0.0628415
Dicyclohexylamine	XBPCUCUWBYBCDP-UHFFFAOYSA-N	C12H23N	181.183	9.53791	1.09197e+06	93.1225	mzVault	0.163309
7-Diethylamino-4-methylcoumarin	AFYCEAFSNDLKSX-UHFFFAOYSA-N	C14H17NO2	231.126	20.9352	1.0419e+06	88.6062	mzVault	0.162011
PPG n7	OWRNLGZKEZSHGO-UHFFFAOYSA-N	C21H44O8	424.304	14.9847	5.17613e+06	86.1666	mzCloud	0.235669	[M+H-NH3]+
Oxycodone	BRUQQQPBMZOVGD-UHFFFAOYSA-N	C18H21NO4	315.147	5.94379	1.01577e+06	94.2917	mzCloud	-0.443828
Benazepril	XPCFTKFZXHTYIP-UHFFFAOYSA-N	C24H28N2O5	424.2	15.8365	981953	95.9844	mzVault	-0.322663
Pyrantel	YSAUAVHXTIETRK-UHFFFAOYSA-N	C11H14N2S	206.088	6.06071	967663	84.1489	mzVault	-0.0980822
10,11-Dihydro-10-hydroxycarbamazepine	BMPDWHIDQYTSHX-UHFFFAOYSA-N	C15H14N2O2	254.106	12.4547	961566	75.1876	mzVault	-0.345071
Methoxyfenozide	QCAWEPFNJXQPAN-UHFFFAOYSA-N	C22H28N2O3	368.21	22.1188	933680	99.9868	mzVault	-0.280263
Losartancarboxaldehyde	FQZSMTSTFMNWQF-UHFFFAOYSA-N	C22H21ClN6O	420.147	12.5739	908251	84.9247	mzVault	-0.115265
Polygodial	AZJUJOFIHHNCSV-UHFFFAOYSA-N	C15H22O2	234.162	24.6087	892758	79.944	mzCloud	-0.0953573
Triphenyl phosphate (TPP)	XZZNDPSIHUTMOC-UHFFFAOYSA-N	C18H15O4P	326.071	25.2427	879026	91.5422	mzVault	-0.279176
Docosahexaenoic acid ethyl ester	ITNKVODZACVXDS-UHFFFAOYSA-N	C24H36O2	356.272	23.7239	877879	82.2096	mzCloud	-0.122792
Oxoamide	WOOSCPWOYYLIHS-UHFFFAOYSA-N	C10H12N2O2	192.09	1.24355	859741	75.7942	mzCloud	0.0631938
Doxylamine	HCFDWZZGGLSKEP-UHFFFAOYSA-N	C17H22N2O	270.173	5.86208	848106	99.816	mzVault	-0.0995928
N-Ethylamphetamine	YAGBSNMZQKEFCO-UHFFFAOYSA-N	C11H17N	163.136	7.34712	835867	85.7549	mzVault	0.35442
N-Desmethylvenlafaxine	MKAFOJAJJMUXLW-UHFFFAOYSA-N	C16H25NO2	263.189	11.4986	831237	84.6142	mzVault	-0.1186
Aliskiren	UXOWGYHJODZGMF-UHFFFAOYSA-N	C30H53N3O6	551.393	16.5463	830927	78.1809	mzCloud	0.867051
Noroxycodone	RIKMCJUNPCRFMW-UHFFFAOYSA-N	C17H19NO4	301.131	5.73564	826079	83.3703	mzVault	0.0990492
Pirlimycin	HBJOXQRURQPDEX-UHFFFAOYSA-N	C17H31ClN2O5S	410.164	12.3905	813691	87.7514	mzCloud	-0.271329
Cocaine	ZPUCINDJVBIVPJ-UHFFFAOYSA-N	C17H21NO4	303.147	10.6099	810453	95.6765	mzVault	-0.414157
Tributyl phosphate	STCOOQWBFONSKY-UHFFFAOYSA-N	C12H27O4P	266.165	25.4511	805387	86.4478	mzVault	-0.066416
N-Desmethyldiltiazem	YOMLDISQSWWYOT-UHFFFAOYSA-N	C21H24N2O4S	400.146	15.3509	795253	92.3468	mzVault	-0.166244
8R-Hydroxy-4Z,6E,10Z-hexadecatrienoic acid		C16H26O3	266.188	16.149	789563	75.2737	mzVault	-0.231994
4-Hydroxyomeprazole sulfide	LVUFHVGKGMRSQW-UHFFFAOYSA-N	C16H17N3O2S	315.104	9.11635	775578	97.5592	mzVault	-0.480651
Laurolactam	JHWNWJKBPDFINM-UHFFFAOYSA-N	C12H23NO	197.178	17.8726	768126	92.0008	mzCloud	0.179643
Canadine	VZTUIEROBZXUFA-UHFFFAOYSA-N	C20H21NO4	339.147	12.6876	757153	86.1175	mzVault	-0.566999
2-Benzothiazolesulfonic acid	ZCXGMSGCBDSEOY-UHFFFAOYSA-N	C7H5NO3S2	214.971	5.65482	737017	91.9213	mzVault	-0.0155844
Diphenhydramine	ZZVUWRFHKOJYTH-UHFFFAOYSA-N	C17H21NO	255.162	14.5807	736165	99.9937	mzVault	-0.19381
Disopyramide	UVTNFZQICZKOEM-UHFFFAOYSA-N	C21H29N3O	339.231	10.5203	715210	92.194	mzVault	-0.484713
Iminostilbene	LCGTWRLJTMHIQZ-UHFFFAOYSA-N	C14H11N	193.089	12.4581	703886	88.5186	mzCloud	0.234808
Pyrene	BBEAQIROQSPTKN-UHFFFAOYSA-N	C16H10	202.078	11.5281	692941	76.8276	mzCloud	0.219415
Tapentadol	KWTWDQCKEHXFFR-UHFFFAOYSA-N	C14H23NO	221.178	10.0099	688507	96.9937	mzVault	-0.0119268
Dehydronifedipine	UMQHJQGNGLQJPF-UHFFFAOYSA-N	C17H16N2O6	344.101	17.4372	684787	92.7946	mzVault	-0.328077
N,N'-Dicyclohexylurea	ADFXKUOMJKEIND-UHFFFAOYSA-N	C13H24N2O	224.189	7.73229	672235	81.1324	mzCloud	0.392568
Ifosfamide	HOMGKSMUEGBAAB-UHFFFAOYSA-N	C7H15Cl2N2O2P	260.025	10.5565	670166	91.6602	mzVault	0.0957996
3,5-Di-tert-butyl-4-hydroxybenzoic acid	YEXOWHQZWLCHHD-UHFFFAOYSA-N	C15H22O3	250.157	22.1468	663670	93.6393	mzVault	-0.0905765
Tebuthiuron	HBPDKDSFLXWOAE-UHFFFAOYSA-N	C9H16N4OS	228.104	12.3514	651546	97.8179	mzVault	-0.00085029
Galaxolidone	PGMHPYRIXBRRQD-UHFFFAOYSA-N	C18H24O2	272.178	22.7143	646403	81.2817	mzCloud	0.131958
Cordycepin	OFEZSBMBBKLLBJ-UHFFFAOYSA-N	C10H13N5O3	251.102	1.19915	644103	91.8279	mzVault	0.0521453
Nobiletin	MRIAQLRQZPPODS-UHFFFAOYSA-N	C21H22O8	402.131	19.5884	631588	93.0692	mzVault	-0.345036
Hydrocodone	LLPOLZWFYMWNKH-UHFFFAOYSA-N	C18H21NO3	299.152	6.55721	629401	97.1633	mzCloud	-0.410914
Phenazone	VEQOALNAAJBPNY-UHFFFAOYSA-N	C11H12N2O	188.095	12.6642	624673	85.1231	mzCloud	0.0229479
Solanidine	JVKYZPBMZPJNAJ-UHFFFAOYSA-N	C27H43NO	397.334	13.5377	617748	81.2341	mzCloud	-0.223163
Valsartan acid	USAWIVMZUYOXCF-UHFFFAOYSA-N	C14H10N4O2	266.08	12.3777	615624	96.6536	mzVault	-0.140009
Quinine	LOUPRKONTZGTKE-UHFFFAOYSA-N	C20H24N2O2	324.184	7.643	610228	91.4923	mzVault	-0.162565
4-Acetamidoantipyrin	OIAGWXKSCXPNNZ-UHFFFAOYSA-N	C13H15N3O2	245.116	5.97139	608298	93.8077	mzVault	0.0117709
Stercobilin	TYOWQSLRVAUSMI-UHFFFAOYSA-N	C33H46N4O6	594.342	14.7858	605624	83.731	mzVault	0.973297
Oxcarbazepine	CTRLABGOLIVAIY-UHFFFAOYSA-N	C15H12N2O2	252.09	11.2876	591878	86.8608	mzVault	-0.119166
6.alpha./.beta.-Hydroxyoxymorphone	AABLHGPVOULICI-UHFFFAOYSA-N	C17H21NO4	303.147	4.96688	590767	93.7901	mzVault	0.0805082
L-Tryptophan	QIVBCDIJIAJPQS-UHFFFAOYSA-N	C11H12N2O2	204.09	4.28333	586732	99.4962	mzVault	0.411212	[M+NH4]+
2-Amino-1,3,4-octadecanetriol	AERBNCYCJBRYDG-UHFFFAOYSA-N	C18H39NO3	317.293	18.6618	585395	75.0878	mzCloud	-0.507023
Climbazol	OWEGWHBOCFMBLP-UHFFFAOYSA-N	C15H17ClN2O2	292.098	17.0135	583901	81.6166	mzVault	-0.223972
3-Methyl-2-quinoxalinol	BMIMNRPAEPIYDN-UHFFFAOYSA-N	C9H8N2O	160.064	1.55663	583434	80.1242	mzCloud	0.14485
.beta.-Carboline-1-propionic acid	CNUHEVWYPKFJHH-UHFFFAOYSA-N	C14H12N2O2	240.09	8.70934	566368	98.9814	mzVault	-0.0903408
5-Oxo-1-propyl-2-pyrrolidineacetic acid	OLNRYIJLDVURDG-UHFFFAOYSA-N	C9H15NO3	185.105	8.00827	561967	86.0972	mzVault	-0.0331196
1H-Inden-2-amine, 2,3-dihydro-5-methoxy-6-methyl-	JLESVLCTIOAHPT-UHFFFAOYSA-N	C11H15NO	177.115	24.826	559445	76.0005	mzVault	-0.061399	[M+NH4]+
1-(3-Methylbenzyl)piperazine	VTEOTZPEMDQENX-UHFFFAOYSA-N	C12H18N2	190.147	6.11585	547556	75.9613	mzCloud	0.272688
Ketamine	YQEZLKZALYSWHR-UHFFFAOYSA-N	C13H16ClNO	237.092	7.97183	531525	96.9845	mzVault	-7.84421e-05
Prometon	ISEUFVQQFVOBCY-UHFFFAOYSA-N	C10H19N5O	225.159	12.0428	531066	96.3493	mzVault	-0.0606304
Isoxaben	PMHURSZHKKJGBM-UHFFFAOYSA-N	C18H24N2O4	332.174	21.925	525021	97.1903	mzVault	-0.0686411
Norlidocaine	WRMRXPASUROZGT-UHFFFAOYSA-N	C12H18N2O	206.142	5.76314	519367	81.897	mzVault	0.35267
Trazodone	PHLBKPHSAVXXEF-UHFFFAOYSA-N	C19H22ClN5O	371.151	12.7407	518872	96.3334	mzVault	-0.641353
Ranitidine	VMXUWOKSQNHOCA-UHFFFAOYSA-N	C13H22N4O3S	314.141	4.05712	511892	94.9648	mzVault	-0.517481
4-Acetamidobenzaldehyde	SKLUWKYNZNXSLX-UHFFFAOYSA-N	C9H9NO2	163.063	10.0552	502546	81.2366	mzCloud	0.271526	[M+H-H2O]+
cis-Zeatin	UZKQTCBAMSWPJD-UHFFFAOYSA-N	C10H13N5O	219.112	1.18323	501366	76.7254	mzVault	0.0377158
Cyclophosphamide	CMSMOCZEIVJLDB-UHFFFAOYSA-N	C7H15Cl2N2O2P	260.025	11.0477	501096	94.2591	mzVault	0.0846429
Vincristine	OGWKCGZFUXNPDA-UHFFFAOYSA-N	C46H56N4O10	824.4	24.8213	496864	76.8751	mzCloud	-1.62786
Erythromycin	ULGZDMOVFRHVEP-UHFFFAOYSA-N	C37H67NO13	733.461	19.0846	487877	93.1958	mzVault	1.63504
Nootkatone	WTOYNNBCKUYIKC-UHFFFAOYSA-N	C15H22O	218.167	24.7867	487000	87.4675	mzCloud	0.0927208
PEG n14	ILLKMACMBHTSHP-UHFFFAOYSA-N	C28H58O15	634.378	9.91804	7.19701e+06	90.8517	mzCloud	1.67707	[M+H-NH3]+
Acebutolol	GOEMGAFJFRBGGG-UHFFFAOYSA-N	C18H28N2O4	336.205	9.19985	484920	89.9762	mzVault	-0.332207
Metoprolol acid	PUQIRTNPJRFRCZ-UHFFFAOYSA-N	C14H21NO4	267.147	6.29203	480492	92.5449	mzVault	-0.206177
Norverapamil	UPKQNCPKPOLASS-UHFFFAOYSA-N	C26H36N2O4	440.268	17.2155	478795	96.4557	mzVault	0.0571372
Sulpiride	BGRJTUBHPOOWDU-UHFFFAOYSA-N	C15H23N3O4S	341.141	4.55534	450819	98.8202	mzVault	-0.623063
N-Desbutylbupivacaine	SILRCGDPZGQJOQ-UHFFFAOYSA-N	C14H20N2O	232.158	15.3399	450006	90.5466	mzVault	-0.105478
12-Aminododecanoic acid	PBLZLIFKVPJDCO-UHFFFAOYSA-N	C12H25NO2	215.189	9.13636	449244	75.4599	mzCloud	-0.0244101
Carnosol	XUSYGBPHQBWGAD-UHFFFAOYSA-N	C20H26O4	330.183	20.9293	447108	76.188	mzVault	-0.37052
Dimethylaminopurine	BVIAOQMSVZHOJM-UHFFFAOYSA-N	C7H9N5	163.086	2.09046	444274	81.2981	mzVault	-0.0525092
Minoxidil	ZFMITUMMTDLWHR-UHFFFAOYSA-N	C9H15N5O	209.128	7.52724	443471	92.2681	mzVault	0.0749417
O-Desarylranolazine	LDEJNELBMSFPDJ-UHFFFAOYSA-N	C17H27N3O3	321.205	5.52565	440841	94.8743	mzVault	-0.3586
Pseudoerythromycin A enol ether	NMIWBQUQCOMGHJ-UHFFFAOYSA-N	C37H65NO12	715.451	17.0313	440055	86.8373	mzVault	1.28528
Cimetidine	AQIXAKUUQRKLND-UHFFFAOYSA-N	C10H16N6S	252.116	3.61841	437929	96.0085	mzVault	-0.100074
2,6-Dichlorobenzamide	JHSPCUHPSIUQRB-UHFFFAOYSA-N	C7H5Cl2NO	188.975	5.60351	437486	92.8113	mzVault	0.253366
3-Hydroxyfluorene	PVUBSZGNXLNTLX-UHFFFAOYSA-N	C13H10O	182.073	11.0421	435461	75.0044	mzCloud	0.310261
4-Methoxycinnamaldehyde	AXCXHFKZHDEKTP-UHFFFAOYSA-N	C10H10O2	162.068	9.27325	430038	88.9516	mzCloud	0.50365
Dimethylaminopurine	BVIAOQMSVZHOJM-UHFFFAOYSA-N	C7H9N5	163.086	1.70448	427812	83.4383	mzVault	0.602431
Guanine	UYTPUPDQBNUYGX-UHFFFAOYSA-N	C5H5N5O	151.049	1.18523	427363	96.4898	mzVault	0.53319
Azoxystrobin	WFDXOXNFNRHQEC-UHFFFAOYSA-N	C22H17N3O5	403.117	21.1099	426190	96.7625	mzCloud	-0.0329024
Febuxostat	BQSJTQLCZDPROO-UHFFFAOYSA-N	C16H16N2O3S	316.088	23.3502	418301	98.2091	mzVault	-0.441817
(±)-Abscisic acid	JLIDBLDQVAYHNE-UHFFFAOYSA-N	C15H20O4	264.136	13.467	417810	83.128	mzCloud	-0.147309
4-Phenylbutyric acid	OBKXEAXTFZPCHS-UHFFFAOYSA-N	C10H12O2	164.084	9.19936	417661	84.6535	mzCloud	0.456896
Dihydromorphine	IJVCSMSMFSCRME-UHFFFAOYSA-N	C17H21NO3	287.152	3.39236	414341	87.2077	mzCloud	-0.00882912
Carbmazepine	FFGPTBGBLSHEPO-UHFFFAOYSA-N	C15H12N2O	236.095	10.5708	6.84754e+06	99.601	mzVault	0.0578242
Isopentenyladenine	HYVABZIGRDEKCD-UHFFFAOYSA-N	C10H13N5	203.117	7.70974	410996	97.1332	mzVault	0.27338
Primidone	DQMZLTXERSFNPB-UHFFFAOYSA-N	C12H14N2O2	218.106	7.76825	2.78179e+06	87.0135	mzVault	-0.275159
Nicotine	SNICXCGAKADSCV-UHFFFAOYSA-N	C10H14N2	162.116	1.15834	405271	96.1761	mzVault	0.364069
8-Methoxyquinolin-4-ol	DJVLMLGPDKKYJW-UHFFFAOYSA-N	C10H9NO2	175.063	7.02017	392841	80.142	mzVault	0.00901959
Rosuvastatin	BPRHUIZQVSMCRT-UHFFFAOYSA-N	C22H28FN3O6S	481.168	19.4392	391967	81.2969	mzCloud	0.346904
1,3-di-o-Tolylguanidine	OPNUROKCUBTKLF-UHFFFAOYSA-N	C15H17N3	239.142	10.7405	391329	90.1182	mzCloud	0.102649
Oxcarbazepine	CTRLABGOLIVAIY-UHFFFAOYSA-N	C15H12N2O2	252.09	12.324	390520	86.1292	mzCloud	-0.123127
Benzoguanamine	GZVHEAJQGPRDLQ-UHFFFAOYSA-N	C9H9N5	187.086	5.39586	388710	91.1592	mzCloud	0.0598358
2,6-Dimethylquinolin-4-ol	LSWRRPBOJDRHSV-UHFFFAOYSA-N	C11H11NO	173.084	3.55303	384516	81.3624	mzVault	0.338154
Oxazepam	ADIMAYPTOBDMTL-UHFFFAOYSA-N	C15H11ClN2O2	286.051	15.536	384474	97.4761	mzVault	-0.30747
Cotinine	UIKROCXWUNQSPJ-UHFFFAOYSA-N	C10H12N2O	176.095	1.21847	1.75342e+06	80.5803	mzCloud	0.198061
Proguanil	SSOLNOMRVKKSON-UHFFFAOYSA-N	C11H16ClN5	253.109	13.5394	370515	88.8998	mzVault	-0.222427
Diphenyl phosphate	ASMQGLCHMVWBQR-UHFFFAOYSA-N	C12H11O4P	250.039	22.6317	367381	88.1752	mzVault	-0.0766371
1-Phenyl-1-hexyn-3-ol	HGUIQUVFOYTZNC-UHFFFAOYSA-N	C12H14O	174.104	19.1791	366976	79.2973	mzVault	0.169512
4-Hydroxytriamterene sulfate	UGLZTFAGJYBEIZ-UHFFFAOYSA-N	C12H11N7O4S	349.059	5.50396	364524	99.7559	mzVault	-0.271245
Sclareolide	IMKJGXCIJJXALX-UHFFFAOYSA-N	C16H26O2	250.193	23.9448	362834	77.3467	mzVault	-0.0239511
Ritalinic acid	INGSNVSERUZOAK-UHFFFAOYSA-N	C13H17NO2	219.126	7.49947	360992	99.2165	mzVault	0.143815
Diclofenac	DCOPUUMXTXDBNB-UHFFFAOYSA-N	C14H11Cl2NO2	295.017	22.0125	359989	99.3435	mzVault	-0.0281977
Clopidogrel	GKTWGGQPFAXNFI-UHFFFAOYSA-N	C16H16ClNO2S	321.059	17.7146	359828	95.5245	mzVault	-0.199137
"MLS000069657-01!(1R,2R)-(-)-PSEUDOEPHEDRINE"	KWGRBVOPPLSCSI-UHFFFAOYSA-N	C10H15NO	165.115	4.30203	357616	94.5275	mzVault	0.888746
3-Methyl-2-quinoxalinol	BMIMNRPAEPIYDN-UHFFFAOYSA-N	C9H8N2O	160.064	1.97947	357611	82.0309	mzCloud	0.305433
Ethyldiphenylphosphine oxide	AKTGKEBIBGSCLD-UHFFFAOYSA-N	C14H15OP	230.086	14.865	357082	79.9129	mzCloud	0.0135466
Tapentadol	KWTWDQCKEHXFFR-UHFFFAOYSA-N	C14H23NO	221.178	22.5687	353285	75.7617	mzCloud	-0.0115702
Norverapamil	UPKQNCPKPOLASS-UHFFFAOYSA-N	C26H36N2O4	440.268	15.821	351615	92.4064	mzVault	-0.502164
Norharman	AIFRHYZBTHREPW-UHFFFAOYSA-N	C11H8N2	168.069	7.61108	349784	83.2785	mzCloud	0.364979
Amantadine	DKNWSYNQZKUICI-UHFFFAOYSA-N	C10H17N	151.136	6.71236	348369	97.7916	mzVault	0.643511
Amisulpride	NTJOBXMMWNYJFB-UHFFFAOYSA-N	C17H27N3O4S	369.172	7.97131	344854	99.0878	mzVault	-0.412185
MCHB-1	WRVZBXHTUOPQJS-UHFFFAOYSA-N	C28H37N3O2	447.289	14.9938	3.20838e+06	80.1032	mzCloud	0.986191
PEG n13	AKWFJQNBHYVIPY-UHFFFAOYSA-N	C26H54O14	590.351	9.54964	8.97524e+06	86.8278	mzCloud	1.69753	[M+H-NH3]+
Fingolimod	KKGQTZUTZRNORY-UHFFFAOYSA-N	C19H33NO2	307.251	17.5697	334284	78.0874	mzCloud	-0.264759
Phthalic anhydride	LGRFSURHDFAFJT-UHFFFAOYSA-N	C8H4O3	148.016	24.6295	334056	86.2701	mzVault	-0.207579	[M+H-H2O]+
Sulindac	MLKXDPUZXIRXEP-UHFFFAOYSA-N	C20H17FO3S	356.088	17.6277	332353	94.5972	mzVault	-0.186769
PEG n16	DHORSBRLGKJPFC-UHFFFAOYSA-N	C32H66O17	722.43	10.5961	2.79378e+06	90.8271	mzCloud	1.9156	[M+H-NH3]+
Imidacloprid-guanidine	UEQZFAGVRGWPDK-UHFFFAOYSA-N	C9H11ClN4	210.067	4.17439	330385	91.9749	mzVault	0.275527
Lidocaine-N-Oxide	YDVXPJXUHRROBA-UHFFFAOYSA-N	C14H22N2O2	250.168	9.32804	330084	87.1785	mzVault	-0.0462792
2-[(1S)-1-Hydroxyethyl]-4(1H)-quinazolinone	BMBSGGZMJQTQSO-UHFFFAOYSA-N	C10H10N2O2	190.074	6.49368	327849	79.4908	mzCloud	0.212138
N-Ethyl-1-naphthylamine	KDFFXYVOTKKBDI-UHFFFAOYSA-N	C12H13N	171.105	21.037	326666	90.0852	mzVault	0.163354
1-(3,4-Dichlorophenyl)-3,3-dimethylurea	XMTQQYYKAHVGBJ-UHFFFAOYSA-N	C9H10Cl2N2O	232.017	17.0944	326486	86.3387	mzVault	0.0722386
PEG n15	OWTQQPNDSWCHOV-UHFFFAOYSA-N	C30H62O16	678.404	10.2679	3.8552e+06	92.392	mzCloud	1.25885	[M+H-NH3]+
Alfuzosin	WNMJYKCGWZFFKR-UHFFFAOYSA-N	C19H27N5O4	389.206	10.685	320345	89.1647	mzVault	-0.127176
Indaziflam		C16H20FN5	301.17	18.5598	318303	98.0738	mzVault	-0.435062
Benzophenone-3	DXGLGDHPHMLXJC-UHFFFAOYSA-N	C14H12O3	228.079	23.1815	316318	98.6833	mzVault	0.0503805
Celecoxib	RZEKVGVHFLEQIL-UHFFFAOYSA-N	C17H14F3N3O2S	381.076	23.4623	312430	89.8407	mzCloud	-0.832401
rac-4-Sulfoxypropranolol	ODCKICSDIPVTRM-UHFFFAOYSA-N	C16H21NO6S	355.109	7.65009	309814	84.6959	mzVault	-0.2729
Famotidine	XUFQPHANEAPEMJ-UHFFFAOYSA-N	C8H15N7O2S3	337.045	3.42242	306699	97.2866	mzVault	0.281206
Norcodeine	HKOIXWVRNLGFOR-UHFFFAOYSA-N	C17H19NO3	285.136	4.79231	306682	90.3392	mzVault	0.328645
Fraxinellone	XYYAFLHHHZVPRN-UHFFFAOYSA-N	C14H16O3	232.11	17.1286	304191	76.5714	mzVault	-0.0445475
PEG n12	WRZXKWFJEFFURH-UHFFFAOYSA-N	C24H50O13	546.325	9.08236	8.43699e+06	86.0455	mzCloud	1.25429	[M+H-NH3]+
Benzoylnorecgonine		C15H17NO4	275.116	8.09865	301079	98.0234	mzVault	0.0343216
Rosuvastatin	BPRHUIZQVSMCRT-UHFFFAOYSA-N	C22H28FN3O6S	481.168	19.8594	299525	79.2239	mzCloud	0.780443
Ethoxyquin	DECIPOUIJURFOJ-UHFFFAOYSA-N	C14H19NO	217.147	26.3328	296094	78.8974	mzCloud	0.0890953
MLS001165756-01!fexofenadine	RWTNPBWLLIMQHL-UHFFFAOYSA-N	C32H39NO4	501.288	18.5488	292304	89.347	mzVault	0.307554
Amitriptyline	KRMDCWKBEZIMAB-UHFFFAOYSA-N	C20H23N	277.183	17.6875	291149	96.5666	mzVault	-0.297712
Hydrocodone	LLPOLZWFYMWNKH-UHFFFAOYSA-N	C18H21NO3	299.152	5.91309	289521	83.3601	mzVault	0.440246
Losartancarboxaldehyde	FQZSMTSTFMNWQF-UHFFFAOYSA-N	C22H21ClN6O	420.147	21.102	289196	96.2927	mzVault	0.403296
Memantine	BUGYDGFZZOZRHP-UHFFFAOYSA-N	C12H21N	179.167	11.8289	289033	90.4651	mzVault	0.210604	[M+NH4]+
3-Methyl-2-quinoxalinone	BMIMNRPAEPIYDN-UHFFFAOYSA-N	C9H8N2O	160.064	7.93857	286856	77.7661	mzVault	0.40442
Cannabidiolic acid	WVOLTBSCXRRQFR-UHFFFAOYSA-N	C22H30O4	358.214	29.4316	284427	89.4502	mzVault	-0.546422
Tetramethyluric acid	QGDOQULISIQFHQ-UHFFFAOYSA-N	C9H12N4O3	224.091	5.54199	281569	85.3797	mzVault	0.0264261
5-Hydroxytryptophol	KQROHCSYOGBQGJ-UHFFFAOYSA-N	C10H11NO2	177.079	5.74153	339473	79.4371	mzVault	0.492675
Milnacipran	GJJFMKBJSRMPLA-UHFFFAOYSA-N	C15H22N2O	246.173	11.4717	278915	93.3782	mzVault	-0.108125	[M+NH4]+
Oxymorphone	UQCNKQCJZOAFTQ-UHFFFAOYSA-N	C17H19NO4	301.131	2.4823	277044	89.3597	mzVault	0.168655
Tangeritin	VGGCDYAXGPXIHL-UHFFFAOYSA-N	C20H20O7	372.121	21.3786	276132	98.9249	mzVault	-0.425587
5'-Carboxymeloxicam	MTQQFYLGAZXHTB-UHFFFAOYSA-N	C14H11N3O6S2	381.009	15.3191	270683	90.0483	mzVault	-0.403792
Norgestrel	WWYNJERNGUHSAO-UHFFFAOYSA-N	C21H28O2	312.209	23.9593	268721	77.9212	mzCloud	-0.51863
PEG n11	PSVXZQVXSXSQRO-UHFFFAOYSA-N	C22H46O12	502.299	8.62372	5.78285e+06	85.8287	mzCloud	1.49763	[M+H-NH3]+
Hydroxydehydronifedipinecarboxylic acid	ARDQNVJJIRIJPD-UHFFFAOYSA-N	C16H14N2O7	346.08	8.74525	267458	85.9428	mzVault	-0.348842
Nonaethylene glycol	YZUUTMGDONTGTN-UHFFFAOYSA-N	C18H38O10	414.246	13.9384	318023	81.5283	mzVault	-0.110693
Pentoxifylline	BYPFEZZEUUWMEJ-UHFFFAOYSA-N	C13H18N4O3	278.138	9.70955	266137	95.0514	mzVault	-0.310995
1,2-Dipiperidinoethane	UYMQPNRUQXPLCY-UHFFFAOYSA-N	C12H24N2	196.194	10.2602	265259	76.5061	mzCloud	0.154706
Pantoprazole sulfide	UKILEIRWOYBGEJ-UHFFFAOYSA-N	C16H15F2N3O3S	367.08	13.5256	265077	92.9312	mzVault	-0.498736
De(methylpiperazinyl) sildenafil	DFABUTFBIDMPKZ-UHFFFAOYSA-N	C17H20N4O5S	392.115	11.0461	263999	75.1493	mzCloud	-0.126781
Phendimetrazine	MFOCDFTXLCYLKU-UHFFFAOYSA-N	C12H17NO	191.131	5.81903	259292	77.2658	mzCloud	0.237599
trans-Crocetin	PANKHBYNKQNAHN-UHFFFAOYSA-N	C20H24O4	328.167	19.9032	258651	75.0895	mzVault	-0.513996
6-Hydroxy-4-methylcoumarin	IRUHWRSITUYICV-UHFFFAOYSA-N	C10H8O3	176.047	17.4266	257700	76.6639	mzVault	0.606666
Xanthone	JNELGWHKGNBSMD-UHFFFAOYSA-N	C13H8O2	196.052	15.2779	255759	88.0828	mzVault	0.396881
4-Benzofuranethanamine, N,.alpha.-dimethyl-	FTXAAPPHMKXGSC-UHFFFAOYSA-N	C12H15NO	189.115	15.7052	253095	80.9251	mzVault	0.40775
Desisopropyldisopyramide	UWNSWIXIVDMCHZ-UHFFFAOYSA-N	C18H23N3O	297.184	8.25553	250090	82.2999	mzVault	-0.163476
N-Ethyl-N-methylcathinone	LOQPFJRCXJZNQV-UHFFFAOYSA-N	C12H17NO	191.131	2.68281	249240	83.0129	mzVault	0.397137
5-O-Desmethylomeprazole sulfide	QAPIOBRWGYAHRI-UHFFFAOYSA-N	C16H17N3O2S	315.104	8.78594	248542	93.5387	mzVault	-0.789824
Crotamiton	DNTGGZPQPQTDQF-UHFFFAOYSA-N	C13H17NO	203.131	18.8433	248541	93.7997	mzCloud	-0.0618377
Boscalid	WYEMLYFITZORAB-UHFFFAOYSA-N	C18H12Cl2N2O	342.033	21.4301	322573	78.1432	mzVault	-0.235079
Lorazepam	DIWRORZWFLOCLC-UHFFFAOYSA-N	C15H10Cl2N2O2	320.012	16.1342	245181	91.2928	mzVault	-0.436682
Benzyl-L-valine methyl ester	LFUIOAXMANYSCA-UHFFFAOYSA-N	C13H19NO2	221.142	3.87539	244363	81.1759	mzVault	-0.579091
Ondansetron	FELGMEQIXOGIFQ-UHFFFAOYSA-N	C18H19N3O	293.153	11.0535	241735	98.5921	mzVault	-0.0979448
Zolpidem phenyl-4-carboxylic acid	FELZONDEFBLTSP-UHFFFAOYSA-N	C19H19N3O3	337.143	10.0744	240005	84.3174	mzVault	-0.461273
6-Methoxyquinoline	HFDLDPJYCIEXJP-UHFFFAOYSA-N	C10H9NO	159.068	6.13103	239566	77.7024	mzCloud	0.244122
Guanosine	NYHBQMYGNKIUIF-UHFFFAOYSA-N	C10H13N5O5	283.092	1.17835	238863	95.6601	mzVault	-0.404532
Mirtazapine	RONZAEMNMFQXRA-UHFFFAOYSA-N	C17H19N3	265.158	8.2745	236294	87.5311	mzCloud	-0.463962
Tributyl phosphate	STCOOQWBFONSKY-UHFFFAOYSA-N	C12H27O4P	266.165	25.0271	232966	99.8019	mzVault	0.0329283
Norquetiapine	JLOAJISUHPIQOX-UHFFFAOYSA-N	C17H17N3S	295.114	11.8919	232167	90.687	mzVault	-0.308817
4-amino-5-chloro-N-[2-(diethylamino)ethyl]-2-methoxybenzamide	TTWJBBZEZQICBI-UHFFFAOYSA-N	C14H22ClN3O2	299.14	8.72535	229916	99.87	mzVault	-0.311091
6-Hydroxy-3,4-dihydro-1H-quinoline-2-one	HOSGXJWQVBHGLT-UHFFFAOYSA-N	C9H9NO2	163.063	6.58322	226407	81.4515	mzVault	0.241865
Sulfometuron methyl	ZDXMLEQEMNLCQG-UHFFFAOYSA-N	C15H16N4O5S	364.084	14.8968	225168	99.6552	mzVault	-0.410418
Palmitoyl ethanolamide	HXYVTAGFYLMHSO-UHFFFAOYSA-N	C18H37NO2	299.282	30.5437	223076	96.2436	mzCloud	-0.314878
N-Desmethyl-loperamide	ZMOPTLXEYOVARP-UHFFFAOYSA-N	C28H31ClN2O2	462.207	18.6305	222971	85.6567	mzCloud	0.300417
Solanidine	JVKYZPBMZPJNAJ-UHFFFAOYSA-N	C27H43NO	397.334	18.8368	219516	86.476	mzCloud	-0.398591
Promethazine sulfoxide	OWTCLFIFAFHQIX-UHFFFAOYSA-N	C17H20N2OS	300.13	9.81273	219012	94.3615	mzVault	-0.237303
Serotonin	QZAYGJVTTNCVMB-UHFFFAOYSA-N	C10H12N2O	176.095	10.4906	217554	82.5731	mzVault	0.319806	[M+NH4]+
Diltiazem	HSUGRBWQSSZJOP-UHFFFAOYSA-N	C22H26N2O4S	414.161	14.8483	216611	85.51	mzVault	-0.169884
(3aS,10aR,10bR)-6,10a-Dimethyl-3-methylene-3,3a,4,5,7,8,10a,10b-octahydrofuro[3',2':6,7]cyclohepta[1,2-b]pyran-2,9-dione	IOGFBFUSBVLQMS-UHFFFAOYSA-N	C15H18O4	262.121	10.8882	215172	77.228	mzCloud	-0.123931
(-)-Caryophyllene oxide	NVEQFIOZRFFVFW-UHFFFAOYSA-N	C15H24O	220.183	26.6264	214884	85.1256	mzCloud	0.255242
Propranolol	AQHHHDLHHXJYJD-UHFFFAOYSA-N	C16H21NO2	259.157	13.5645	214742	96.2487	mzVault	-0.414222
Hexaethylene glycol	IIRDTKBZINWQAW-UHFFFAOYSA-N	C12H26O7	282.168	5.77547	213733	99.9908	mzVault	-0.165601
Sulfamethoxazole	JLKIGFTWXXRPMT-UHFFFAOYSA-N	C10H11N3O3S	253.052	4.48487	213574	89.2924	mzVault	-0.176076
7-Methoxycoumarin	LIIALPBMIOVAHH-UHFFFAOYSA-N	C10H8O3	176.047	12.3679	212930	83.8907	mzVault	0.0324847
Fraxinol	PBPNOAHYDPHKFH-UHFFFAOYSA-N	C11H10O5	222.053	9.76397	212246	90.4432	mzVault	0.240428
Maraviroc	GSNHKUDZZFZSJB-UHFFFAOYSA-N	C29H41F2N5O	513.328	13.2228	209558	83.046	mzCloud	0.027411
2-(4-Morpholinyl)benzothiazole	VVUVJGRVEYHIHC-UHFFFAOYSA-N	C11H12N2OS	220.067	14.356	205606	76.1009	mzVault	-0.224181
2-Hydroxysimazine	YQIXRXMOJFQVBV-UHFFFAOYSA-N	C7H13N5O	183.112	4.7928	204131	85.527	mzCloud	0.121588
Palmitoyl ethanolamide	HXYVTAGFYLMHSO-UHFFFAOYSA-N	C18H37NO2	299.282	18.4926	201319	75.3006	mzCloud	-0.620786
Azoxystrobin acid	IKCXDZCEWZARFL-UHFFFAOYSA-N	C21H15N3O5	389.101	17.9781	200722	80.9162	mzVault	0.0175301
1,4a-Dimethyl-6-methylene-5-[2-(2-oxo-2,5-dihydro-3-furanyl)ethyl]decahydro-1-naphthalenecarboxylic acid	FHQSDRHZGCMBKG-UHFFFAOYSA-N	C20H28O4	332.199	20.6506	196936	86.1508	mzCloud	-0.344266
Solanidine	JVKYZPBMZPJNAJ-UHFFFAOYSA-N	C27H43NO	397.334	19.6766	193439	89.5468	mzCloud	-0.177759
3-(2-Hydroxyethyl)indole	MBBOMCVGYCRMEA-UHFFFAOYSA-N	C10H11NO	161.084	12.076	192459	86.736	mzVault	0.311529
Rivaroxaban	KGFYHTZWPPHNLQ-UHFFFAOYSA-N	C19H18ClN3O5S	435.066	14.7933	192318	89.2659	mzVault	-0.0379197
(1S,4aS,5R)-5-[2-(3-Furyl)ethyl]-1,4a-dimethyl-6-methylenedecahydro-1-naphthalenecarboxylic acid	ZQHJXKYYELWEOK-UHFFFAOYSA-N	C20H28O3	316.204	23.7093	191570	81.0145	mzCloud	-0.351915
Heptapropylene glycol monobutyl ether	AKKIGPXIYOXIPA-UHFFFAOYSA-N	C25H52O8	480.366	24.4211	189490	91.1713	mzVault	-0.0439933
N-Desbutylbupivacaine	SILRCGDPZGQJOQ-UHFFFAOYSA-N	C14H20N2O	232.158	7.06191	187489	88.361	mzVault	0.290831
Codeine	OROGSEYTTFOCAN-UHFFFAOYSA-N	C18H21NO3	299.152	8.11755	184715	84.5016	mzCloud	-0.395799
1-Palmitoyl-2-hydroxy-sn-glycero-3-phosphoethanolamine	YVYMBNSKXOXSKW-UHFFFAOYSA-N	C21H44NO7P	453.286	27.3934	182640	93.8362	mzVault	0.202316
Cobicistat	ZCIGNRJZKPOIKD-UHFFFAOYSA-N	C40H53N7O5S2	775.355	21.3896	182116	83.9774	mzCloud	1.97729
5,7,3',4',5'-Pentamethoxyflavone	GIKVSFNAEBQLGB-UHFFFAOYSA-N	C20H20O7	372.121	18.4336	177935	81.1055	mzVault	-0.425587
Cetirizine N-Oxide	IVDOUUOLLFEMJQ-UHFFFAOYSA-N	C21H25ClN2O4	404.15	18.1466	176713	92.0579	mzVault	-0.184051
Omeprazole sulfide	XURCIPRUUASYLR-UHFFFAOYSA-N	C17H19N3O2S	329.12	11.9663	176105	94.5365	mzVault	0.00217949
SMZ-Pt	LVUVWJASQQPDSL-UHFFFAOYSA-N	C17H16N8O4S	428.102	9.53837	173845	80.6826	mzVault	-0.150645
Oleamide	FATBGEAMYMYZAF-UHFFFAOYSA-N	C18H35NO	281.272	30.7904	173237	90.6262	mzVault	-0.325063
NCGC00380917-01!5,7-dihydroxy-2-(2-methylpropyl)-8-[(2S,3R,4R,5S,6R)-3,4,5-trihydroxy-6-(hydroxymethyl)oxan-2-yl]chromen-4-one		C19H24O9	396.142	9.86549	171263	75.1025	mzVault	-0.121819
Candesartan	HTQMVQVXFRQIKW-UHFFFAOYSA-N	C24H20N6O3	440.16	17.0181	170282	81.8471	mzVault	-0.117082
Triamterene	FNYLWPVRPXGIIP-UHFFFAOYSA-N	C12H11N7	253.108	7.64125	417033	85.3828	mzCloud	2.40425
Alantolactone	PXOYOCNNSUAQNS-UHFFFAOYSA-N	C15H20O2	232.146	15.7162	167112	75.8443	mzVault	0.0413698
N,N-Dimethylsphingosine	YRXOQXUDKDCXME-UHFFFAOYSA-N	C20H41NO2	327.314	21.3762	166311	77.3096	mzCloud	-0.534298
6.alpha./.beta.-Hydroxyoxymorphone	AABLHGPVOULICI-UHFFFAOYSA-N	C17H21NO4	303.147	2.38607	197138	96.3835	mzVault	-0.225714
Griseofulvin	DDUHZTYCFQRHIY-UHFFFAOYSA-N	C17H17ClO6	352.071	17.6995	163299	95.4552	mzVault	-0.268622
Isoalantolactone	CVUANYCQTOGILD-UHFFFAOYSA-N	C15H20O2	232.146	12.4305	163220	76.8948	mzVault	-1.49575
3,6-Dimethylchromone	CNWMARIMEBTYMR-UHFFFAOYSA-N	C11H10O2	174.068	13.9246	162805	76.9154	mzVault	0.152483
4-Hydroxyatorvastatin lactone	KDJMDZSAAFACAM-UHFFFAOYSA-N	C33H33FN2O5	556.237	23.3127	162709	78.0739	mzVault	0.884828
Dextromethorphan	MKXZASYAUGDDCJ-UHFFFAOYSA-N	C18H25NO	271.194	16.8214	162630	80.8898	mzCloud	0.197087
Pyroquilon	XRJLAOUDSILTFT-UHFFFAOYSA-N	C11H11NO	173.084	13.1592	161222	76.3448	mzVault	0.342655
5'-S-Methyl-5'-thioadenosine	WUUGFSXJNOTRMR-UHFFFAOYSA-N	C11H15N5O3S	297.09	4.29527	160826	85.1406	mzVault	-0.083053
Voriconazole	BCEHBSKCWLPMDN-UHFFFAOYSA-N	C16H14F3N5O	349.115	16.8989	160456	97.3318	mzVault	-0.283461
3,6-Dimethylchromone	CNWMARIMEBTYMR-UHFFFAOYSA-N	C11H10O2	174.068	17.5837	158067	82.971	mzVault	0.0219117
Cytisine	ANJTVLIZGCUXLD-UHFFFAOYSA-N	C11H14N2O	190.111	2.51879	157578	77.271	mzCloud	0.485171
MLS001148205-01!41859-67-0	IIBYAHWJQTYFKB-UHFFFAOYSA-N	C19H20ClNO4	361.108	18.8125	157498	92.9089	mzVault	-0.270106
Methylphenidate	DUGOZIWVEXMGBE-UHFFFAOYSA-N	C14H19NO2	233.142	9.4747	157261	97.4979	mzVault	0.0744161
Anisomycin	YKJYKKNCCRKFSL-UHFFFAOYSA-N	C14H19NO4	265.131	7.35862	156441	88.9994	mzVault	-0.214159
Loratadine	JCCNYMKQOSZNPW-UHFFFAOYSA-N	C22H23ClN2O2	382.145	18.5842	155212	96.6905	mzVault	-0.43382
Norisoboldine	HORZNQYQXBFWNZ-UHFFFAOYSA-N	C18H19NO4	313.131	8.11611	154705	79.4721	mzVault	-0.145094	[M+NH4]+
N-Desmethylvenlafaxine	MKAFOJAJJMUXLW-UHFFFAOYSA-N	C16H25NO2	263.189	6.96453	154329	82.1103	mzCloud	0.0115924
Galaxolidone	PGMHPYRIXBRRQD-UHFFFAOYSA-N	C18H24O2	272.178	22.593	239133	90.5533	mzCloud	-0.197397
Piperine	MXXWOMGUGJBKIW-UHFFFAOYSA-N	C17H19NO3	285.136	21.2348	152141	94.4825	mzVault	-0.140996
Oxaprozin	OFPXSFXSNFPTHF-UHFFFAOYSA-N	C18H15NO3	293.105	20.6214	151869	93.2569	mzVault	-0.577604
Solanidine	JVKYZPBMZPJNAJ-UHFFFAOYSA-N	C27H43NO	397.334	20.1647	147512	83.8404	mzCloud	-0.24498
Piperine	MXXWOMGUGJBKIW-UHFFFAOYSA-N	C17H19NO3	285.136	20.8691	145364	93.9434	mzVault	-0.455649
3,6-Dimethylchromone	CNWMARIMEBTYMR-UHFFFAOYSA-N	C11H10O2	174.068	14.0475	144722	78.1093	mzVault	-0.0144474
(4-Chlorophenyl)biguanide	HTYFFCPFVMJTKM-UHFFFAOYSA-N	C8H10ClN5	211.062	6.2612	832281	81.1781	mzVault	0.127981
JWH-210	LACIUQLUNACUKC-UHFFFAOYSA-N	C26H27NO	369.209	29.3611	144476	78.0233	mzCloud	-0.469743
(S)-Dibutyl 3-hydroxybutyl phosphate	LJBNHONKIDIOPD-UHFFFAOYSA-N	C12H27O5P	282.16	18.4302	143486	85.5398	mzVault	-0.149277
4`-Hydroxy Diclofenac	KGVXVPRLBMWZLG-UHFFFAOYSA-N	C14H11Cl2NO3	311.012	18.0724	142773	94.6435	mzVault	-0.360426
Yangonin	XLHIYUYCSMZCCC-UHFFFAOYSA-N	C15H14O4	258.089	18.9691	142099	76.8206	mzVault	-0.666752
Norquetiapine	JLOAJISUHPIQOX-UHFFFAOYSA-N	C17H17N3S	295.114	10.3605	142078	92.1687	mzVault	-0.178343
Scopoletin	RODXRVNMMDRFIK-UHFFFAOYSA-N	C10H8O4	192.042	8.64864	141034	80.7315	mzVault	0.223994
Etodolac (Lodine)	NNYBQONXHNTVIJ-UHFFFAOYSA-N	C17H21NO3	287.152	21.0411	140114	79.5291	mzVault	-0.56137
Nevirapine	NQDJXKOVJZTUJA-UHFFFAOYSA-N	C15H14N4O	266.117	10.1464	139146	75.0798	mzCloud	0.0235837
Eicosatetraynoic acid	MGLDCXPLYOWQRP-UHFFFAOYSA-N	C20H24O2	296.178	16.3098	137497	78.114	mzCloud	-0.349213
Paracetamol	RZVAJINKPMORJF-UHFFFAOYSA-N	C8H9NO2	151.063	3.04935	137007	89.1918	mzCloud	0.800792
Rifaximin	NZCRJKRKKOLAOJ-UHFFFAOYSA-N	C43H51N3O11	785.352	21.4902	139626	78.6055	mzCloud	1.92201
Ketoprofen	DKYWVDODHFEZIM-UHFFFAOYSA-N	C16H14O3	254.094	17.9378	136124	94.7237	mzVault	-0.213363
Lauric isopropanolamide	MMBILEWCGWTAOV-UHFFFAOYSA-N	C15H31NO2	257.235	24.9399	135851	93.8876	mzVault	-0.311313
Oxfendazole	BEZZFPOZAYTVHN-UHFFFAOYSA-N	C15H13N3O3S	315.068	10.9148	135662	85.6082	mzVault	-0.435338
4',6'-Dimethoxy-2'-hydroxyacetophenone	FBUBVLUPUDBFME-UHFFFAOYSA-N	C10H12O4	196.074	18.3494	135326	79.1873	mzVault	0.106232
2-Hydroxycarbamazepine	VPZIYMMSJFWLSP-UHFFFAOYSA-N	C15H12N2O2	252.09	9.62207	1.62584e+06	95.3009	mzVault	-0.153409
3,4-Dimethoxycinnamic acid	HJBWJAPEBGSQPR-UHFFFAOYSA-N	C11H12O4	208.074	16.7563	132415	78.6028	mzVault	0.246772
NCGC00384660-01!8-(2-hydroxypropan-2-yl)-8,9-dihydrofuro[2,3-h]chromen-2-one	YRAQEMCYCSSHJG-UHFFFAOYSA-N	C14H14O4	246.089	12.5717	132132	80.0646	mzVault	-0.0495396
Antipyrine	VEQOALNAAJBPNY-UHFFFAOYSA-N	C11H12N2O	188.095	8.24471	130996	75.6967	mzVault	0.13169
Genistein	TZBJGXHYKVUXJN-UHFFFAOYSA-N	C15H10O5	270.053	15.1294	130928	97.9066	mzCloud	0.0377104
Tributylamine	IMFACGCPASFAPR-UHFFFAOYSA-N	C12H27N	185.214	12.0986	130212	90.9134	mzVault	-0.0307545
6-Hydroxy-3,4-dihydro-1H-quinoline-2-one	HOSGXJWQVBHGLT-UHFFFAOYSA-N	C9H9NO2	163.063	8.54284	334128	76.5571	mzVault	0.0767664
PEG n14	ILLKMACMBHTSHP-UHFFFAOYSA-N	C28H58O15	634.378	8.90246	2.20639e+06	85.2093	mzCloud	1.22457	[M+H-NH3]+
Acid Orange 7 (free acid)	RDUJRVXKAIVTDH-UHFFFAOYSA-N	C16H12N2O4S	328.052	14.8243	123791	87.2137	mzVault	-0.378059
1-Phenyl-1-hexyn-3-ol	HGUIQUVFOYTZNC-UHFFFAOYSA-N	C12H14O	174.104	16.1872	123382	80.3233	mzVault	0.443556
Vildagliptin	SYOKIDBDQMKNDQ-UHFFFAOYSA-N	C17H25N3O2	303.195	4.42546	120125	91.7292	mzVault	-0.337608
Carbamazepine-10,11-epoxide	ZRWWEEVEIOGMMT-UHFFFAOYSA-N	C15H12N2O2	252.09	11.938	123816	93.9754	mzVault	-0.0949335
MLS002637723-01!	DWNAQMUDCDVSLT-UHFFFAOYSA-N	C20H14O4	318.089	15.8613	119390	99.8986	mzVault	-0.344576
Norlidocaine	WRMRXPASUROZGT-UHFFFAOYSA-N	C12H18N2O	206.142	5.7544	276711	96.9012	mzVault	-1.94708
Nordiazepam	AKPLHCDWDRPJGD-UHFFFAOYSA-N	C15H11ClN2O	270.056	15.597	146408	80.31	mzCloud	0.0812637
Lincomycin	OJMMVQQUTAEWLP-UHFFFAOYSA-N	C18H34N2O6S	406.214	5.84955	117641	97.5015	mzVault	-0.0780246
Hydroxychloroquine	XXSMGPRMXLTPCZ-UHFFFAOYSA-N	C18H26ClN3O	335.176	6.31504	127530	95.68	mzVault	-0.549105
Spinosyn A	SRJQTHAZUNRMPR-UHFFFAOYSA-N	C41H65NO10	731.461	24.6482	117204	88.7107	mzCloud	1.87556
Butorphanol	IFKLAQQSCNILHL-UHFFFAOYSA-N	C21H29NO2	327.22	8.24175	114298	76.9055	mzCloud	0.0183925
Zolpidem	ZAFYATHCZYHLPB-UHFFFAOYSA-N	C19H21N3O	307.168	11.3359	114149	89.8829	mzCloud	-0.208658
PRI_303.1340_15.8		C16H18N2O4	302.127	11.0631	129814	83.4234	mzVault	-0.156072
Phe-Leu	RFCVXVPWSPOMFJ-UHFFFAOYSA-N	C15H22N2O3	278.163	8.68876	109166	77.2469	mzVault	-0.550678
Fluopyram	KVDJTXBXMWJJEF-UHFFFAOYSA-N	C16H11ClF6N2O	396.046	22.0204	105171	92.3164	mzVault	-0.092665
Erythromycin	ULGZDMOVFRHVEP-UHFFFAOYSA-N	C37H67NO13	733.461	18.5175	103553	94.9395	mzVault	1.14869
Norharman	AIFRHYZBTHREPW-UHFFFAOYSA-N	C11H8N2	168.069	6.5717	103542	82.7844	mzCloud	0.401711
Phenylephrine	SONNWYBIRXJNDC-UHFFFAOYSA-N	C9H13NO2	167.095	10.472	100959	76.8416	mzVault	0.209426
Flavone	VHBFFQKBGNRLFZ-UHFFFAOYSA-N	C15H10O2	222.068	21.3274	100762	77.4374	mzCloud	0.0313831
Normorphine	ONBWJWYUHXVEJS-UHFFFAOYSA-N	C16H17NO3	271.121	1.71495	100431	75.1624	mzVault	-0.251829
Trenbolone	MEHHPFQKXOUFFV-UHFFFAOYSA-N	C18H22O2	270.162	28.0763	100050	76.2565	mzCloud	-0.309136
DDAO	ZRKZFNZPJKEWPC-UHFFFAOYSA-N	C12H27NO	201.209	19.644	99785.4	91.935	mzVault	-0.0586326
6,7-Dimethylesculetin	GUAFOGOEJLSQBT-UHFFFAOYSA-N	C11H10O4	206.058	10.443	98339.8	77.3015	mzVault	0.13207
3,6,9,12,15-Pentaoxanonacosan-1-ol, hydrogen sulfate	ZSHALVUPMIAAPD-UHFFFAOYSA-N	C24H50O9S	514.318	27.2336	96590.2	80.973	mzVault	1.06876	[M+H-NH3]+
Venlafaxine N-Oxide	LASJEFFANGIOGZ-UHFFFAOYSA-N	C17H27NO3	293.199	13.1232	95960.4	84.3121	mzVault	-0.725382
Abietic acid	RSWGJHLUYNHPMX-UHFFFAOYSA-N	C20H30O2	302.225	22.216	94342.4	78.0851	mzVault	-0.45284
Equilin	WKRLQDKEXYKHJB-UHFFFAOYSA-N	C18H20O2	268.146	15.0902	93489.7	76.8029	mzVault	0.0707758
Byakangelicol	ORBITTMJKIGFNH-UHFFFAOYSA-N	C17H16O6	316.095	13.3999	92872.2	77.423	mzVault	-0.492615
1,2-Benzisothiazolin-3-one	DMSMPAJRVJJAGA-UHFFFAOYSA-N	C7H5NOS	151.009	13.9114	90902.3	87.9387	mzCloud	0.489555
Dexpanthenol	SNPLKNRPJHDVJA-UHFFFAOYSA-N	C9H19NO4	205.131	2.27286	89360.6	89.416	mzVault	-0.0626086
Glaucine	RUZIUYOSRDWYQF-UHFFFAOYSA-N	C21H25NO4	355.178	11.9557	220843	85.5426	mzVault	-0.0760177
Monobutyl phthalate	YZBOVSFWWNVKRJ-UHFFFAOYSA-N	C12H14O4	222.089	18.4176	87736	93.0459	mzVault	0.530578
Labetalol	SGUAFYQXFOLMHL-UHFFFAOYSA-N	C19H24N2O3	328.179	10.3958	85288.3	84.3428	mzVault	-0.16887
N-Desmethylcyclobenzaprine	XECQQDXTQRYYBH-UHFFFAOYSA-N	C19H19N	261.152	11.3832	994692	88.6749	mzVault	-0.106428
(+)-Chlorpheniramine	SOYKEARSMXGVTM-UHFFFAOYSA-N	C16H19ClN2	274.124	10.3212	81987	92.4419	mzVault	-0.229916
Irgarol	HDHLIWCXDDZUFH-UHFFFAOYSA-N	C11H19N5S	253.136	16.2192	81468.4	97.6749	mzVault	-0.14583
Tebuconazole	PXMNMQRDXWABCY-UHFFFAOYSA-N	C16H22ClN3O	307.145	22.4287	81092.5	98.797	mzVault	-0.137936
Sertraline	VGKDLMBJGBXTGI-UHFFFAOYSA-N	C17H17Cl2N	305.074	18.788	78274	89.7178	mzVault	-0.3881
Paracetamol	RZVAJINKPMORJF-UHFFFAOYSA-N	C8H9NO2	151.063	1.69374	81861.4	80.6156	mzCloud	0.598779
Spinosyn A	SRJQTHAZUNRMPR-UHFFFAOYSA-N	C41H65NO10	731.461	24.6821	117204	85.0914	mzCloud	-0.395698
3-Indoleacrylic acid	PLVPPLCLBIEYEA-UHFFFAOYSA-N	C11H9NO2	187.063	6.83637	76329.5	78.538	mzVault	0.230058
3-Cyclohexyl-6-(dimethylamino)-1-methyl-s-triazine-2,4(1H,3H)-dione	CAWXEEYDBZRFPE-UHFFFAOYSA-N	C12H20N4O2	252.159	12.6986	73449.2	95.5669	mzVault	-0.0333707
Linderane	KBMSVODXFLAQNJ-UHFFFAOYSA-N	C15H16O4	260.105	16.9437	73110	76.5075	mzVault	0.508183
PRI_303.1340_15.8		C16H18N2O4	302.127	15.2092	72636.8	88.2344	mzVault	0.026745
Propazine-2-hydroxy	RUOTUMSRCIMLJK-UHFFFAOYSA-N	C9H17N5O	211.143	8.8531	80826.7	87.0447	mzVault	-0.170448
Codeine	OROGSEYTTFOCAN-UHFFFAOYSA-N	C18H21NO3	299.152	9.13386	72236.6	75.3298	mzCloud	-0.497813
Imazapyr	CLQMBPJKHLGMQK-UHFFFAOYSA-N	C13H15N3O3	261.111	6.92901	72033.2	87.8286	mzVault	-0.272219
5-Hydroxy-7-methoxyflavanone	ORJDDOBAOGKRJV-UHFFFAOYSA-N	C16H14O4	270.089	15.6143	70524.5	99.8068	mzVault	-0.86311
1'-Hydroxymidazolam	QHSMEGADRFZVNE-UHFFFAOYSA-N	C18H13ClFN3O	341.073	13.4389	68636.9	86.5502	mzVault	-0.751487
Loperamide	RDOIQAHITMMDAJ-UHFFFAOYSA-N	C29H33ClN2O2	476.223	20.5549	70278.2	82.6082	mzVault	0.285883
Equilin	WKRLQDKEXYKHJB-UHFFFAOYSA-N	C18H20O2	268.146	16.9777	63655	77.9681	mzVault	-0.612081
Cannabipiperidiethanone	AJSBNWAHEDVQJT-UHFFFAOYSA-N	C24H28N2O2	376.215	27.4408	51823.4	78.7558	mzCloud	-0.334282
